## **Amyloid beta acts synergistically as a pro-inflammatory cytokine**

Thomas J. LaRocca<sup>\*1,2</sup>, Alyssa N. Cavalier<sup>1,2</sup>, Christine M. Roberts<sup>1</sup>,  
Maddie R. Lemieux<sup>1</sup>, Christopher D. Link<sup>\*1</sup>

<sup>1</sup>Department of Integrative Physiology, University of Colorado Boulder

<sup>2</sup>Department of Health and Exercise Science, Colorado State University (current)

\*Corresponding Authors:

Tom LaRocca  
Center for Healthy Aging  
Department of Health and Exercise Science  
Colorado State University  
1582 Campus Delivery  
Fort Collins, CO 80523-1582  
tom.larocca@colostate.edu

Chris Link  
Department of Integrative Physiology  
Institute for Behavioral Genetics  
University of Colorado Boulder  
354 UCB  
Boulder, CO 80309  
linkc@colorado.edu

## SUMMARY

The amyloid beta (A $\beta$ ) peptide is believed to play a central role in Alzheimer's disease (AD), the most common age-related neurodegenerative disorder. However, the natural, evolutionarily-selected functions of A $\beta$  are incompletely understood. Here, we report that nanomolar concentrations of A $\beta$  act synergistically with known cytokines to promote pro-inflammatory activation in primary human astrocytes (a cell type increasingly implicated in brain aging and AD). Using transcriptomics (RNA-seq), we show that A $\beta$  can directly substitute for the complement component C1q in a cytokine cocktail previously shown to induce astrocyte immune activation. Furthermore, we show that astrocytes synergistically activated by A $\beta$  have a transcriptional signature similar to neurotoxic "A1" astrocytes known to accumulate with age and in AD. Interestingly, we find that this biological action of A $\beta$  at low concentrations is distinct from the transcriptome changes induced by the high/supraphysiological doses of A $\beta$  often used in *in vitro* studies. Collectively, our results suggest an important, cytokine-like function for A $\beta$  and a novel mechanism by which it may directly contribute to the neuroinflammation associated with brain aging and AD.

## INTRODUCTION

The amyloid beta (A $\beta$ ) peptide is centrally involved in Alzheimer's disease (AD), the most common age-related neurodegenerative disorder [1]. However, the exact biological function and role of A $\beta$  in the development of AD remain poorly understood. In fact, although aggregated A $\beta$  is a well-known feature of AD pathology (i.e., in senile plaques), the peptide itself has been reported to act as a regulator of synaptic function, an antimicrobial peptide, a tumor suppressor, and a modulator of blood-brain barrier permeability [2-4]. Among these and other possible biological roles for A $\beta$ , one compelling (and potentially unifying) idea is that A $\beta$  may be an immune modulator. Indeed, evidence suggests that A $\beta$  may activate pro-inflammatory signaling pathways in multiple CNS cell types [5], and this observation is consistent with the fact that neuroinflammation is a central feature of brain aging and AD [1, 6].

Neuroinflammation is characterized by increased production of pro-inflammatory cytokines in the CNS, especially by microglia and astroglia [7, 8]. It occurs in response to many stimuli (e.g., pathogens, injury, etc.) and plays an important role in protecting neurons and the brain. Growing evidence demonstrates that *chronic* neuroinflammation develops with aging [9, 10], and the neurotoxic cytokine milieu associated with this persistent neuroinflammation contributes to the development of AD [6, 11]. Innate immune activation in glial cells appears to be particularly important in this context [12, 13], and recent data demonstrate a specific accumulation of pro-inflammatory "disease-associated astrocytes" in both brain aging and AD [14]. Still, the possible mechanisms underlying astroglial activation in brain aging/AD are unclear.

One potentially simple explanation for glial cell innate immune activation in brain aging/AD could be a direct, cytokine-like effect of A $\beta$ , which is thought to be produced largely by neurons [15, 16]. This idea has been suggested before [17], and there have been some reports of immune activation in response to A $\beta$  [9, 18-20]. The general concept is also consistent with: 1) the fact that A $\beta$  shares structural similarities (e.g., small amphipathic structure, expression in multiple tissues) with anti-microbial peptides like cathelicidin, which has been reported to stimulate pro-inflammatory cytokine secretion in glial cells [21]; 2) numerous studies showing that A $\beta$  can induce pores in cell membranes [22], which is a common characteristic of immune-activating anti-microbial peptides; 3) reports that LPS (a classic innate immune stimulus) increases A $\beta$  in the brain [23]; and 4) growing evidence that, similar to pro-inflammatory cytokines, A $\beta$  levels increase with aging in the human brain [24, 25]. Collectively, these observations suggest that the A $\beta$  peptide itself could have important, pro-inflammatory signaling effects in the CNS that are highly relevant to brain aging/AD. However, while aggregated A $\beta$  can clearly induce microglial immune activation [26], the effects of soluble A $\beta$  on human glial cells have not been extensively investigated. Here we used transcriptome analyses to investigate the global effects of soluble A $\beta$  on primary human astrocytes. We observed that exposing these cells to 1  $\mu$ M A $\beta$ <sub>1-42</sub> caused transcriptional changes indicative of immune activation. However, this response was absent with more physiological levels of A $\beta$  (10 nM), leaving open the question of whether A $\beta$  can truly act as a pro-inflammatory

cytokine in the early stages of brain aging/AD (i.e., before higher concentrations/aggregates of the peptide develop).

Interestingly, others have shown that a cocktail of microglial-produced cytokines (tumor necrosis factor  $\alpha$  [TNF- $\alpha$ ], Interleukin 1 $\alpha$  [IL-1 $\alpha$ ], and complement protein 1q [C1q]) can convert mouse astrocytes into an immune activated, neurotoxic "A1" state [27]. The same group also demonstrated that these "A1" immune-activated astrocytes (marked by expression of complement protein C3) increase with aging in mice [28] and are abundant in AD patient brains [27], suggesting that reactive astrocytes could directly contribute to age-related AD. These observations highlight the point that pro-inflammatory cytokines act in concert *in vivo* [29], which could suggest that the pro-inflammatory activity of A $\beta$  might require other, synergistic cytokines. In support of this idea, we show here that primary human astrocytes can be converted to a reactive, A1-like state using either the originally reported TNF- $\alpha$ +IL-1 $\alpha$ +C1q cocktail, or substituted cocktails in which 10 nM A $\beta$  replaces C1q or IL-1 $\alpha$ . Our findings suggest that immune activation may be a natural biological function of A $\beta$  that contributes to coordinated pro-inflammatory responses in the CNS, and this could have important implications for our understanding of early mechanisms in age/AD-related neuroinflammation.

## RESULTS

### Immunomodulatory effects of A $\beta$ on human astrocytes

In initial studies, we treated primary human astrocytes with 1  $\mu$ M A $\beta_{1-42}$  (a high but commonly used dose) and performed RNA-seq to profile changes in gene expression. We found that this high dose of A $\beta$  differentially affected transcript levels of numerous genes. In fact, A $\beta$  significantly increased the expression of >2600 genes and reduced >2700 genes vs. controls (**Figure 1A**, next page). Consistent with previous reports that A $\beta$  may be pro-inflammatory, gene ontology analyses indicated that these A $\beta$ -induced gene expression changes included increased transcription of inflammatory genes, marked by enrichment for gene ontology terms related to immune/defense responses, cytokine signaling and interferon responses (**Figure 1B**). A coherent biological response was not as obvious in the downregulated transcriptional modules, although several gene ontology terms were associated with ion transport and neurotransmitter/synapse modulation (**Figure 1B**). These findings are in line with studies that have documented the production of pro-inflammatory cytokines and reactive oxygen species (immune defense mediators) by astrocytes in response to high dose A $\beta$  [30-32], and with more recent reports of immune/inflammatory gene expression in astrocytes isolated from AD patient brains [33]. However, when we replicated these studies using a more physiological level of A $\beta_{1-42}$  (10nM), we observed no transcriptome/inflammatory gene expression changes (**Figure 1C**).

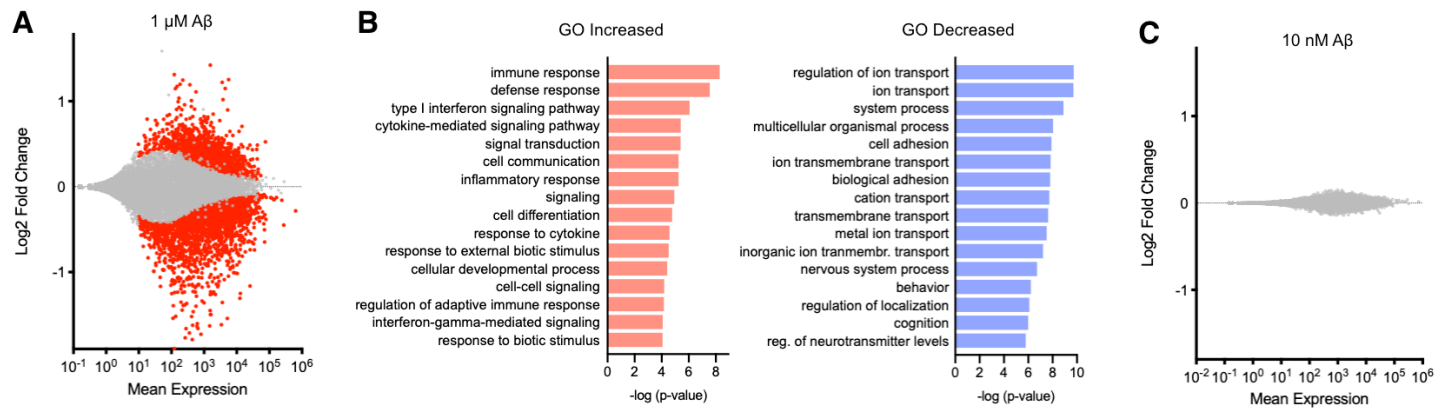

**Figure 1. Transcriptome analysis of human astrocytes treated with high and low concentration A $\beta$ .**

**(A)** MA plot showing Log<sub>2</sub> fold change and mean gene expression levels in primary human astrocytes treated with 1  $\mu$ M A $\beta$  for 24 h. Note >5000 significantly increased/decreased genes shown in red (FDR<0.1).

**(B)** Top transcriptional modules increased/decreased in gene ontology (GO) analysis of 1  $\mu$ M A $\beta$ -treated astrocytes.

**(C)** MA plot showing Log<sub>2</sub> fold change and mean gene expression (no significant changes) in astrocytes treated with 10 nM A $\beta$  for 24 h. All experiments performed in triplicate with cells from one donor.

## Evidence for cytokine-like effects of A $\beta$

We considered the possibility that 10 nM A $\beta_{1-42}$  failed to elicit immune activation in astrocytes because, *in vivo*, A $\beta$  might act in concert with other pro-inflammatory cytokines. Building on work by Liddelow et al. [27], who demonstrated that a cocktail of three microglial-produced cytokines (TNF- $\alpha$ , IL-1 $\alpha$  and C1q) was required for strong immune activation of murine astrocytes, we tested the idea that more physiological levels of A $\beta$  might act synergistically with pro-inflammatory cytokines that are linked with aging/AD and astrocyte immune activation during aging [28]. First, we tested permutations of the TNF- $\alpha$ +IL-1 $\alpha$ +C1q cocktail [27] in which we substituted A $\beta$  for individual cytokines (all in serum-free media). Using immunofluorescence staining for CD44, a cellular adhesion molecule that tracks with astrocyte immune activation [27, 34, 35], we found that: 1) the cytokine-only TNF- $\alpha$ +IL-1 $\alpha$ +C1q cocktail does, in fact, activate human astrocytes; and 2) we could substitute A $\beta$  for C1q or IL-1 $\alpha$  and achieve similar astrocyte activation (**Figure 2A**, next page). We then repeated these experiments and immunoblotted for additional proteins, and we found that the synergistic effect of A $\beta$  in this cytokine cocktail was greatest when substituting it for C1q (i.e., TNF- $\alpha$ +IL-1 $\alpha$ +A $\beta$ ), as indicated by greater expression of glial fibrillary acidic protein (GFAP, a common marker of reactive astrocytes) and IL-1 $\beta$  (a pro-inflammatory cytokine released by immune-activated glial cells) [13] (**Figure 2B**). In these exploratory trials, we used both A $\beta$  and oligomerized A $\beta$  (which may be more toxic [36], but that we had not tested at first); we found greater activation with non-oligomerized peptide and therefore used this in subsequent, quantitative studies, as follows: Using IL-1 $\beta$  and intercellular adhesion molecule 1 (ICAM-1) as indicators of AD-relevant immune activation [37-39], we found in a dose/response experiment that low concentration A $\beta_{1-42}$  (but not as low as 1 nM) could fully substitute for C1q in activating human astrocytes (**Figure 2C**). In fact, we found that ~10 nM A $\beta$  combined with similar concentrations of TNF- $\alpha$  and IL-1 $\alpha$  was sufficient to markedly increase levels of both IL-1 $\beta$  and ICAM-1, both of which were not increased in response to high-dose (1  $\mu$ M) A $\beta$  (i.e., in **Figure 1**).

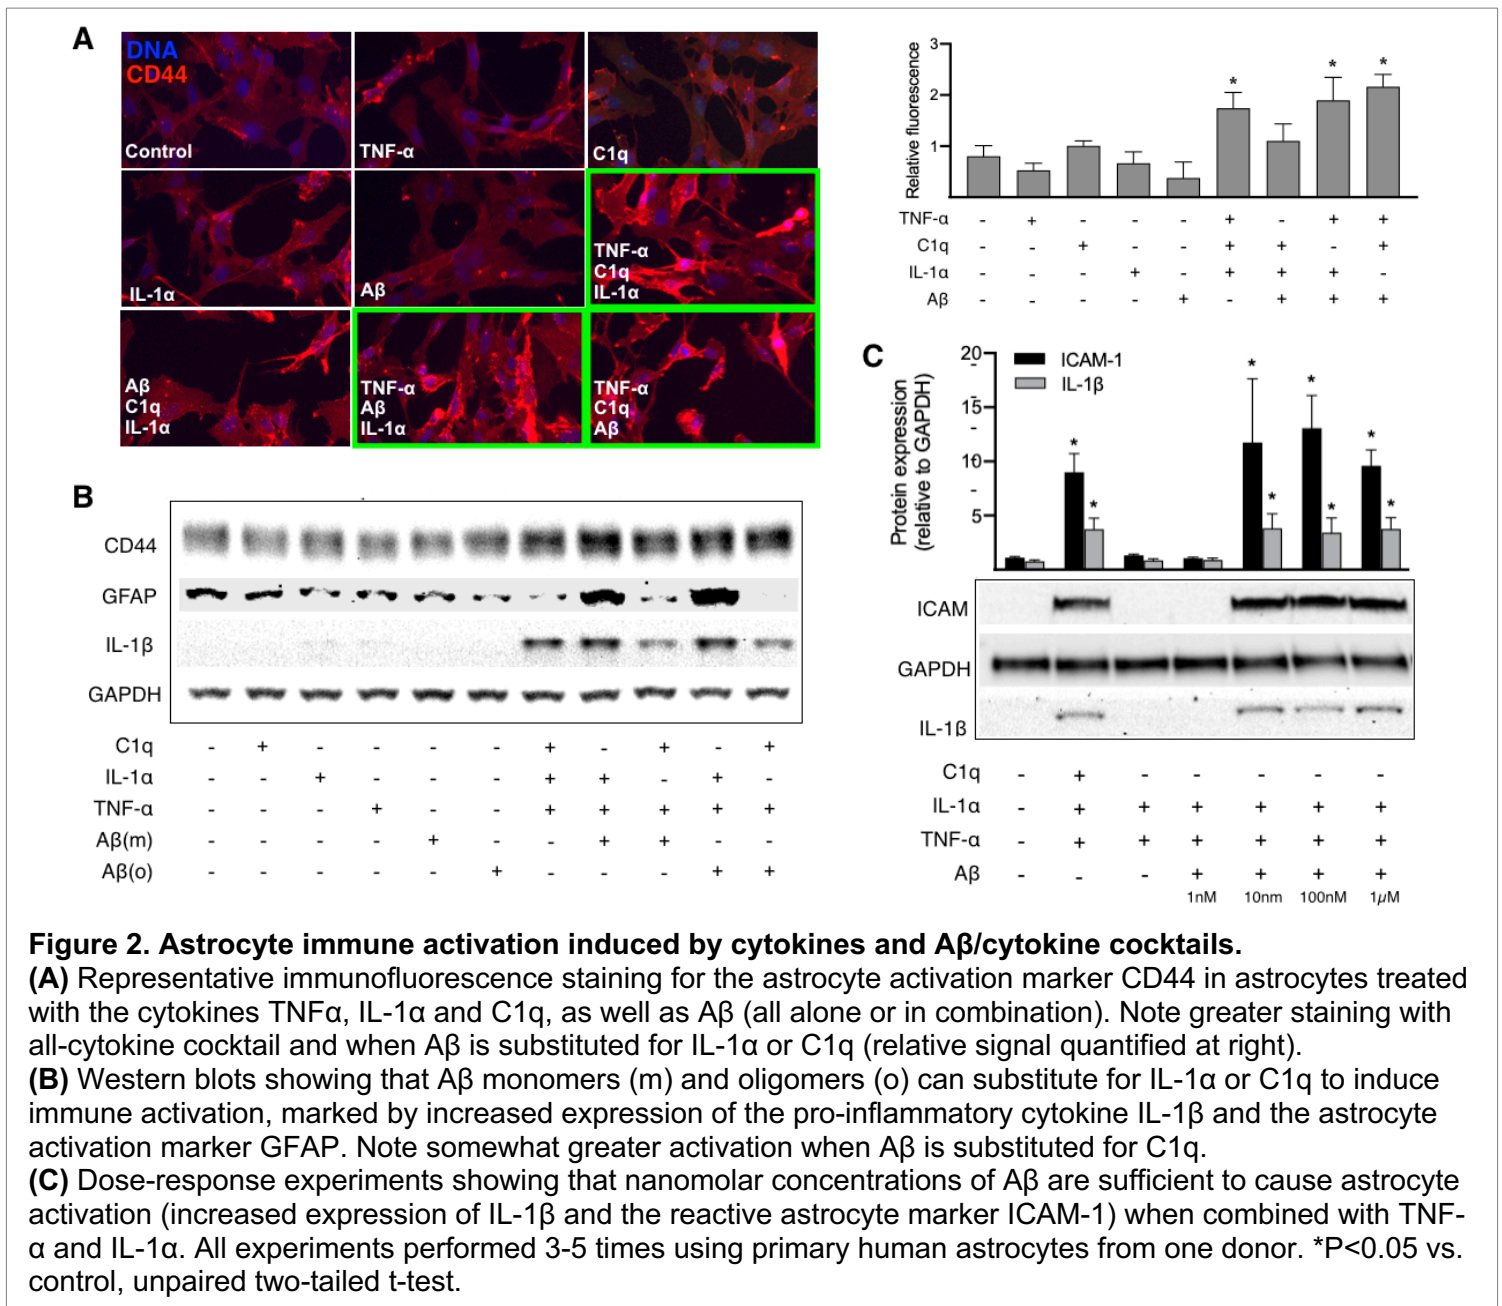

### Aβ/cytokine-induced transcriptome changes

To extend our analysis of human astrocyte activation beyond the limited set of markers employed in Figure 2, we repeated our experiments using RNA-seq to capture the global effects of Aβ/cytokine exposure. In these studies, we also used astrocytes from three different donors to identify the most conserved effects of the treatment. As we previously observed in replicate cultures from a single donor (**Figure 1C**), we found that 10 nM Aβ<sub>1-42</sub> alone had minimal effects on transcript accumulation (**Figure 3A**, next page). Similarly, and in agreement with previous reports [27], TNF-α combined only with IL-1α also caused minimal transcriptome changes (**Figure 3B**). However, the addition of either C1q or Aβ to this cocktail resulted in a major biological response, reflected by significantly increased/decreased expression of ~2500 genes (**Figure 3C,D**). Gene expression patterns induced by the cytokine-only cocktail (TNF-α+IL-1α+C1q) and the Aβ/cytokine cocktail

(TNF- $\alpha$ +IL-1 $\alpha$ +A $\beta$ ) were strikingly similar, as reflected by no major differences (**Figure 3E**) and strong inter-treatment correlation (**Figure 3F**), again suggesting that A $\beta$  could have cytokine-like effects. Moreover, as expected from the highly similar transcriptome patterns induced by these two treatments, gene ontology analysis revealed very similar gene set enrichments (**Figure 3G**). In particular, both treatments upregulated transcriptional modules related to immune system activation, cytokine/interferon signaling and inflammatory responses, whereas common downregulated transcriptional modules included gene sets modulating neurogenesis, synaptic structure, and other cellular health/development pathways. Interestingly, gene expression changes induced by the A $\beta$ /cytokine cocktail only correlated weakly with those induced by high dose (1  $\mu$ M) A $\beta$  alone (**Figure 3H**). Many of the genes most affected by the A $\beta$ /cytokine cocktail but not by A $\beta$  alone were mediators of innate immune responses (e.g., C3 and IL-1 $\beta$ ) and/or established markers of reactive astrocytes (e.g., lipocalin-2, LCN2) [27, 40], further suggesting that physiological A $\beta$  may have a distinct role in immune activation.

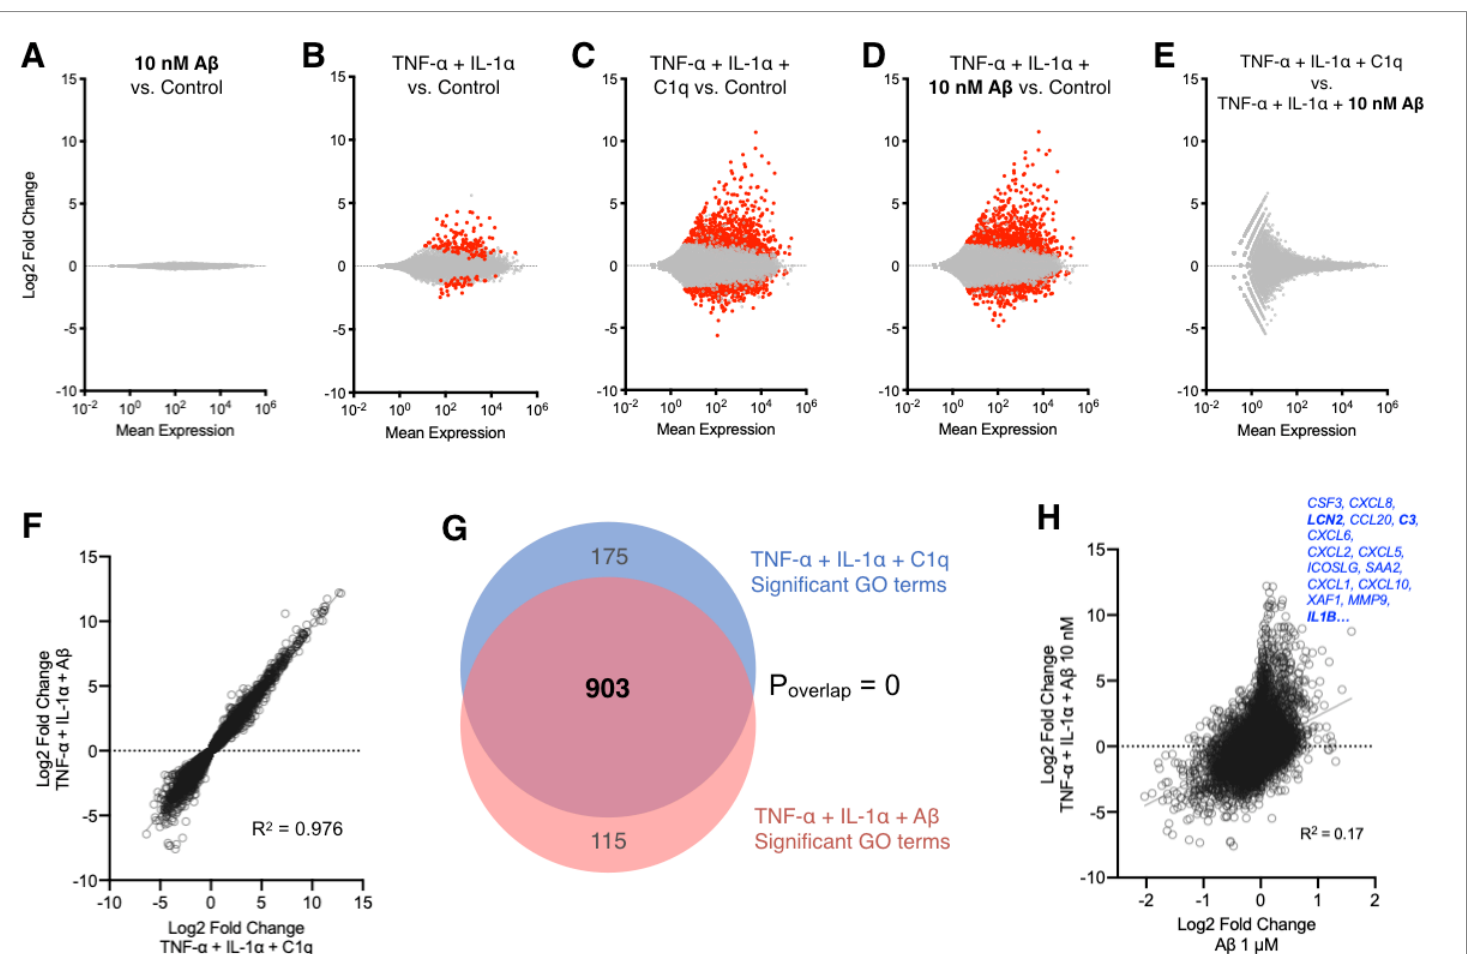

**Figure 3. Similar transcriptional changes with cytokines and A $\beta$ /cytokine cocktails.**

(A-E) MA plots showing Log<sub>2</sub> fold change and mean gene expression in astrocytes treated with low-dose (10 nM) A $\beta$  and/or combinations of TNF- $\alpha$ , IL-1 $\alpha$  or C1q. Note no significant transcriptome changes with 10 nM A $\beta$  alone and modest changes with TNF- $\alpha$ +IL-1 $\alpha$ , but major and similar gene expression differences with both TNF- $\alpha$ +IL-1 $\alpha$ +C1q and TNF- $\alpha$ +IL-1 $\alpha$ +A $\beta$ . Significantly increased/decreased genes in red (FDR<0.1).

(F) Correlation between gene expression changes induced by cytokine cocktail vs. A $\beta$ /cytokine cocktail.

(G) Comparison of gene ontology (GO) terms significantly increased/decreased by cytokine-only and A $\beta$ /cytokine cocktail.

(H) Weak correlation between gene expression changes induced by A $\beta$ /cytokine cocktail vs. high concentration (1  $\mu$ M) A $\beta$  alone; transcripts most different with A $\beta$ /cytokine cocktail vs. A $\beta$  alone in blue. All experiments performed in primary human astrocytes from three different donors.

## A $\beta$ /cytokine-activated astrocytes are similar to disease-associated astrocytes

To determine specifically which biological pathways may be activated when A $\beta$  synergizes with cytokines, we examined the genes that were differentially expressed in response to the A $\beta$ /cytokine cocktail vs. TNF- $\alpha$  and IL-1 $\alpha$  alone (**Figure 4A**). While this approach yielded fewer significant hits, gene ontology analysis of these transcripts pointed clearly to immune activation and cytokine signaling (**Figure 4B**).

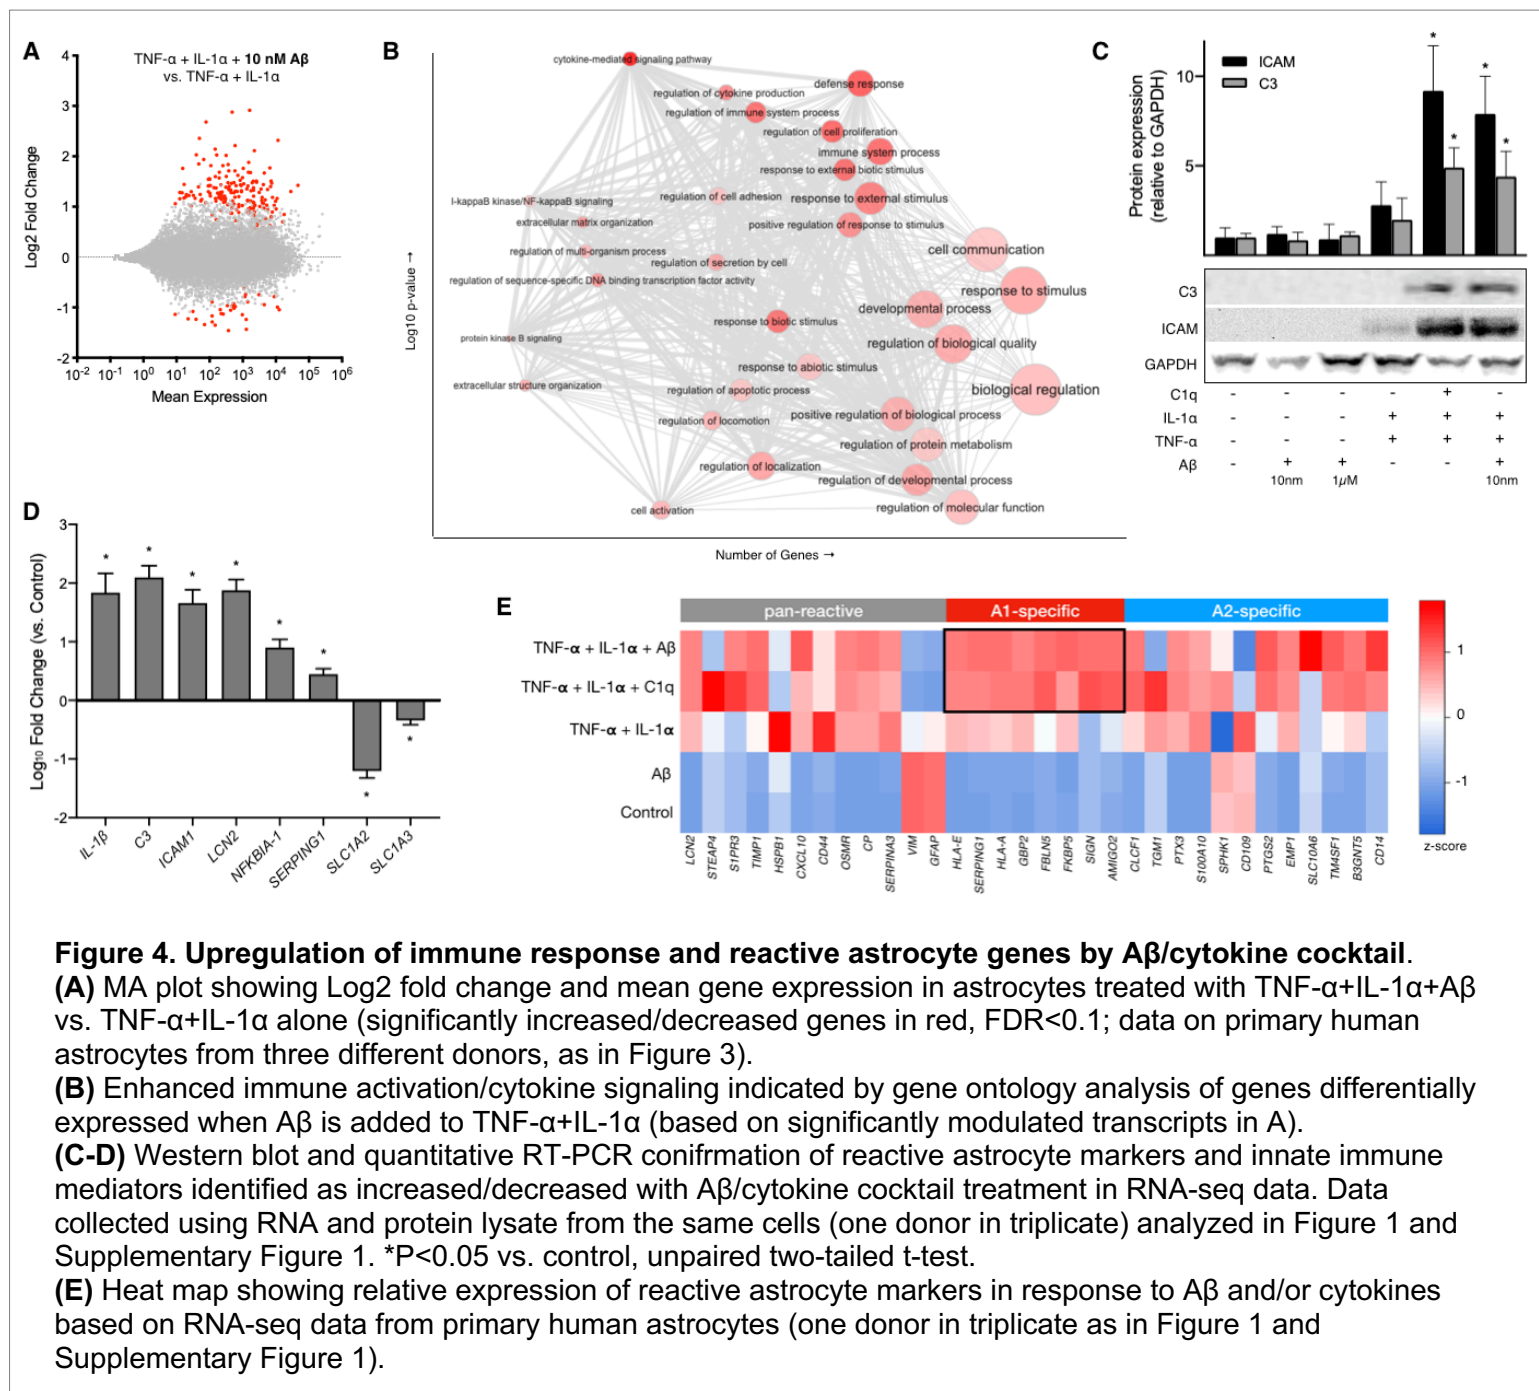

We next asked if these A $\beta$ /cytokine-activated human astrocytes could be equivalent to the reactive, neurotoxic "A1" astrocytes induced by cytokine treatment of murine astrocytes. To test this possibility, we performed RNA-seq on A $\beta$ /cytokine-treated astrocytes from one biological donor in triplicate (as in Figure 1), in



order to reduce variability and increase resolution of key biological pathways. We found that these cells responded to A $\beta$ /cytokine treatment with transcriptomic changes similar to those observed in our three-donor experiments (**Supplementary Figure 1**), and that gene expression differences in single vs. three-donor experiments were highly correlated ( $R^2=0.84$ ,  $p<0.000001$ ), supporting this approach. We then confirmed changes in key genes that increased/decreased in both these and our three-donor data by both immunoblotting and RT-PCR, with a particular focus on mediators of innate immune activation and established markers of reactive astrocytes. We confirmed increased protein levels for two key reactive astrocyte markers (C3 and ICAM-1) in response to A $\beta$ /cytokine treatment and the cytokine-only cocktail (**Figure 4C**). We also confirmed that A $\beta$ /cytokine treatment caused significant increases in mRNA for: IL1B (IL-1 $\beta$ ) and C3 (innate immune response mediators); nuclear factor  $\kappa$  B (NF $\kappa$ B, a major pro-inflammatory transcription factor); and *ICAM-1*, serpin G1 (*SERPING1*) and *LCN2*, all markers of reactive astrocytes [27, 40] (**Figure 4D**). Reduced transcripts confirmed by RT-PCR included excitatory amino acid transporters 1 and 2 (*SLC1A2/GLUT1* and *SLC1A3/GLUT2*), in line with our gene ontology analyses showing altered expression of synaptic function modulators. Interestingly, we noted that 1  $\mu$ M A $\beta$  did not affect the expression of IL-1 $\beta$  and C3 (**Figure 4C**), which is consistent with our initial RNA-seq data on this treatment. This observation further supports the idea that while A $\beta$  may have effects on its own at high concentrations, it has an important biological function that may involve synergy with known pro-inflammatory cytokines at lower, physiologically relevant doses.

Finally, having confirmed that human astrocytes treated with the A $\beta$ /cytokine cocktail expressed classic markers of astrocyte activation, we analyzed our RNA-seq data to determine if the treated astrocytes resembled "A1" reactive astrocytes that are neurotoxic, or "A2" activated astrocytes that are reportedly protective [27]. Both types of astrocyte are marked by activation of specific genes/proteins, as well as a suite of common response factors ("pan-reactive" astrocyte markers). As observed in previous mouse studies, we found that astrocytes treated with TNF- $\alpha$ +IL-1 $\alpha$ +C1q increased expression of the full suite of A1 astrocyte markers. Moreover, in support of the idea that A $\beta$  may contribute to astrocyte toxicity, we also found that A $\beta$ /cytokine-treated astrocytes increased expression of this same set of markers (**Figure 4E**).

## DISCUSSION

Our studies extend on previous data [27, 28] by showing that a synergistic TNF- $\alpha$ +IL-1 $\alpha$ +C1q cytokine cocktail induces immune activation in human astrocytes, and by demonstrating that A $\beta$  may have an important, previously unrecognized role in neuroinflammatory signaling. This finding is highlighted by our observation that A $\beta$ , at plausible physiological levels, can substitute for C1q in the activation of human astrocytes.

The idea that a potential "natural" function of A $\beta$  contributes to AD pathology is new but gaining traction. Indeed, many earlier studies have focused on the pro-inflammatory, cellular effects of A $\beta$  at high micromolar (aggregation-prone) concentrations. Here, we extend on those data with a whole-transcriptome (RNA-seq)

analysis of biological pathways that may be involved in the response to high-dose A $\beta$ . For example, we note that major transcriptional modules upregulated by A $\beta$  in our data include numerous genes related to interferon response factors (IRFs), TNF proteins and receptors, and NF- $\kappa$ B signaling—many of which have been linked with A $\beta$  before, but not in the same dataset. These and others' data on the effects of high concentration A $\beta$  may be relevant in the context of late-stage AD (i.e., when A $\beta$  aggregates). However, many groups are beginning to reconsider the role of A $\beta$  in AD through the lens of its potential/reported physiological functions [3], and the number of studies investigating the effects of A $\beta$  at physiologically relevant concentrations is growing. These more recent investigations have shown that nano- and even picomolar concentrations of A $\beta$  can modulate neuronal signaling and microglial activity [41, 42]. Our data are consistent with these recent reports, but they also provide new evidence for distinct biological effects of low concentration A $\beta$  on astrocytes, which are increasingly implicated in brain aging and neurodegenerative diseases like AD [14, 28, 43]. In fact, taken together with recent evidence that innate immune activation may also drive A $\beta$  production [44], our data could suggest a feed-forward model in which A $\beta$  exacerbates immune activation in astrocytes and immune-activated astrocytes produce more A $\beta$ . Our studies also raise a number of important questions:

First, to what extent do these cell culture experiments reflect *in vivo* cell physiology? Estimates of soluble A $\beta$  peptide concentrations in the brain/cerebrospinal fluid are typically in the picomolar range [45, 46]. However, the existence of A $\beta$  aggregates in senile plaques, coupled with biochemical studies demonstrating that concentrations of ~100 nM are required for A $\beta$  aggregation [47], suggest that local A $\beta$  concentrations significantly exceed the average brain A $\beta$  concentration [48]. We note that we have used 10 nM levels of both cytokines and A $\beta$  in our studies, and thus the synergistic pro-inflammatory effects of these peptides in cultured astrocytes are occurring at equivalent concentrations. We administered these treatments for 24 h, as this timepoint caused the greatest activation in preliminary studies, similar to what others have observed, but future studies could explore even lower concentrations and longer duration treatments that might further mimic *in vivo* physiology. The primary human astrocytes used in our study were from fetal sources, raising the possible concern that they may not fully reflect adult brain astrocytes. However, these primary cells are arguably: 1) more reflective of *in vivo* physiology than any related cell lines; and 2) a better model than aged and/or iPSC-derived astrocytes for investigating the *basic* biological effects of A $\beta$ /cytokines, as their fundamental biological signaling pathways may be more intact than cells subjected to aging/reprogramming/other changes. Indeed, fetal CNS cells are typically used in cell culture experiments (e.g., rat embryonic hippocampal cultures) for these and other reasons. We cannot exclude the possibility that adult astrocytes would respond differently, but we are unaware of a specific mechanism that would produce this result. We also note that a recent report demonstrates that hiPSC-derived astrocytes from adult donors can be converted to neurotoxic, A1 astrocytes with the same TNF- $\alpha$ +IL-1 $\alpha$ +C1q cocktail used in our studies [49], and all of the gene/transcript changes we confirmed in our data (Figure 4) follow the same pattern in RNA-seq data from that study. Interestingly, in both our data and this recent publication, some A1 astrocyte genes in reported in mice (e.g., *GFAP*) are not increased with cytokine treatment; this may be an important area for future study (i.e., determining specific differences between murine and human reactive astrocytes). Indeed, recent evidence suggests that AD-

associated glial gene expression patterns may be markedly different in humans vs. mice [50] (although we note that all A1 astrocyte genes identified in mice that also have human orthologs were increased in cytokine-treated cells in our data).

Next, what species of A $\beta$  are responsible for its pro-inflammatory effects? Our studies have employed nominally monomeric A $\beta$ <sub>1-42</sub>, freshly prepared from dried HFIP-solubilized synthetic peptide. As we cannot control multimerization of the peptide during its 24 h incubation with cultured astrocytes, we cannot directly infer that the A $\beta$  monomer is the pro-inflammatory species (although this could be more consistent with a role as a secreted cytokine-like molecule). We note that treatment with intentionally oligomerized A $\beta$  using the media pre-incubation protocol originally described by Klein and colleagues [51] caused similar levels of immune marker induction (Figure 2B). Identification of the specific A $\beta$  species that lead to immune activation will likely require additional studies that employ other versions of the A $\beta$  peptide believed to have reduced (e.g., A $\beta$ <sub>1-40</sub>, A $\beta$  G37L) or increased (A $\beta$  E22 delta) oligomerization capacity [52-54].

How could A $\beta$  (or specific A $\beta$  species) act in concert with cytokines to synergistically promote astrocyte activation? This is the salient question arising from our studies. Conceptually, A $\beta$  could be acting through two different (but not mutually exclusive) types of mechanism: 1) direct interaction via an A $\beta$ -specific receptor, activating an intracellular signaling cascade that converges with pathways stimulated by TNF- $\alpha$ , IL-1- $\alpha$  and C1q; or 2) by enhancing signaling downstream of these cytokines, perhaps by sensitizing the relevant receptors. There is a complex and sometimes contradictory literature on possible A $\beta$  receptors [55, 56], and few of the associated studies have used astrocytes. Receptors and intracellular signaling pathways for the microglial cytokines we have used are much better understood, although their complexity confounds the ready identification of an obvious target for intervention. Thus, it may be necessary to conduct a large scale, unbiased genetic screen (e.g., a full-genome lentivirus-based CRISPR study) to determine the mechanism by which A $\beta$  may act as a pro-inflammatory cytokine.

Finally, are the pro-inflammatory effects of A $\beta$ /cytokines on astrocytes relevant to Alzheimer's disease? Recent findings associating late onset AD (LOAD) risk alleles (e.g., in TREM2, CD33, ApoE, etc.) with microglial function [57, 58] have highlighted the likely role of neuroinflammation in AD. Astrogliosis is a common component of AD pathology, and the detection of putative neurotoxic "A1" astrocytes in aging and AD brains [27, 28] suggests a mechanism by which neuroinflammation could have a primary role in neuropathology (i.e., immune-activated glial cells causing neuronal death, rather than the other way around). Moreover, a specific population of pro-inflammatory "disease-associated astrocytes" has recently been detected in the context of both brain aging and AD [14], and we note that the most significantly upregulated genes in these disease-associated astrocytes (e.g., *GFAP*, *APOE*, *CST3*, etc.) are also significantly upregulated by the A $\beta$ /cytokine cocktail used in our experiments. Thus, our studies suggest a model in which the accumulation of A $\beta$  in AD could have a dual role in inducing neuroinflammation: accumulation of insoluble

A $\beta$  in senile plaques can lead to microglial immune activation, while synergy between soluble A $\beta$  and microglial-secreted cytokines promotes the induction of neurotoxic "A1" astrocytes. Interestingly, deletion of the TNF- $\alpha$  receptor (*TNFR1*) has been reported to prevent the memory and neuronal dysfunction induced by injection of A $\beta$  oligomers into mice [59], which is consistent with the hypothesis that the neurotoxicity of A $\beta$  could in part stem from its synergistic pro-inflammatory interaction with TNF- $\alpha$ .

Collectively, our findings have potentially broader implications in that they could relate to the etiology of age-related (sporadic) AD. While there is a strong consensus that A $\beta$  accumulation plays a central role in the initiation of AD pathology, the causes of this accumulation have not been established. If the A $\beta$  peptide is indeed a natural, evolutionarily selected immune modulator, insults that provoke an innate immune response might be expected to induce increased production of A $\beta$ . Numerous studies have associated bacteria or viruses with AD [60-62]. These studies have largely relied on analysis of postmortem brain samples, and thus cannot demonstrate causality. However, a recent study has shown that low level infection of a human cortical brain model with herpes simplex virus type 1 (HSV-1) results in gliosis accompanied by increased expression of both A $\beta$ <sub>1-42</sub> and TNF- $\alpha$  [63]. It is therefore tempting to speculate that microbial exposure in the brain could play a role in AD pathology via innate immune activation that upregulates A $\beta$ , and that the age-related accumulation of A $\beta$  (which eventually leads to aggregation/plaques) might be a consequence of these events.

## MATERIALS AND METHODS

### Astrocyte cell culture and treatments

Primary human astrocytes were used for all experiments. Cells from three different donors were purchased from different vendors (Lonza, lot number 0000647218; ScienCell, lot 22156; and Fisher/Gibco, lot 1948466). Vendors confirmed similar procedures for astrocyte isolation based on previously established protocols [64], in which the cerebral cortex was dissected, washed, minced, enzymatically digested to remove connective tissue and dissociated into astrocyte-specific medium in culture flasks and grown for several weeks, followed by isolation of adherent astrocytes by removing floating neurospheres (including via agitation), replating and expansion. All cells had typical astrocyte morphology and tested ~90% positive for GFAP (**Supplementary Figure 2**). We confirmed GFAP expression and also immuno-stained cells for fibroblast-specific protein 1 (FSP-1), but we observed minimal/no staining for this non-astrocyte marker in any cultures. Astrocytes were maintained in complete astrocyte growth medium (ScienCell) at 37°C and 5% CO<sub>2</sub> in a humidified incubator. Cells were subcultured when confluent and grown to ~90% confluency for all experiments. All experiments were performed in serum-free media on passage 2-3 cells; treatments were applied by adding fresh medium containing pre-mixed reagents, and cells were harvested after 24 h incubation as previously described [34]. Lyophilized cytokines (TNF- $\alpha$ , IL-1 $\alpha$ , C1q) were obtained from Sigma-Aldrich, resuspended in molecular biology grade water to make stock solutions, aliquoted and frozen for use in experiments (final experimental concentrations: 0.03 ng/ $\mu$ L [TNF- $\alpha$ ], 0.30 ng/ $\mu$ L [IL-1 $\alpha$ ] and 4 ng/ $\mu$ L [C1q]) [27]. A $\beta$ <sub>1-42</sub> peptides (Anaspec and

Abcam) were prepared following standard protocols [65] as dried HFIP films, then dissolved in fresh, anhydrous DMSO (Sigma) to make a ~5 mM solution, diluted in cold F12 media at target concentrations either for immediate use (monomers) or incubation overnight to produce oligomers when indicated, as previously described [66]. All experiments were repeated 3-5 times.

### **RNA-seq and gene expression analyses**

RNA-seq and gene expression analyses were performed using standard methods as previously described [34]. After the indicated treatments, astrocyte cultures were rinsed with DPBS and lysed in Trizol (Thermo), and RNA was recovered with an RNA-specific spin column kit (Direct-Zol, Zymo Research) including a DNase I treatment to remove genomic DNA. Poly(A)-selected libraries were generated using sera-mag magnetic oligo(dT) beads (Thermo Scientific) and Illumina TruSeq kits. All libraries were sequenced on an Illumina NovaSeq 6000 platform to produce >40 M 150-bp paired-end fastq reads per sample. These reads were trimmed and filtered with the fastp program [67], then aligned to the hg38 *Homo sapiens* genome using the STAR aligner [68]. Gene/read counts were generated using HTseq-count [69], and differential gene expression was analyzed with Deseq2 [70]. Differentially expressed genes were then analyzed for gene ontology enrichment using both the GOrilla algorithm [71] and DAVID [72], and visualized using ReviGO [73]. To confirm RNA-seq results by RT-PCR, cDNA was generated from ~1 ug RNA per condition with random hexamers using Super Script IV First-Strand cDNA Synthesis Reaction (Invitrogen) according to manufacturer's instructions, and a linearity curve was generated for all replicates. 5 ng cDNA was then used for PCR reactions (PerfeCTa SYBR Green FastMix Low ROX; Quanta Biosciences), which were quantified on an ABI 7900 instrument and normalized to GAPDH for analysis/presentation. Primer sequences were: IL-1 $\beta$  forward ATGCACCTGTACGATCACTG, reverse ACAAAGGACATGGAGAACACC; C3 forward AGGCCAAAGATCAACTCACC, reverse ATAGTGTTCTTGGCATCCTGAG; ICAM-1 forward CAATGTGCTATTCAAACCTGCCC, reverse CAGCGTAGGGTAAGGTTCTTG; LCN2 forward TGAGCACCAACTACAACCAG, reverse AGAGATTTGGAGAAGCGGATG; NFKBIA-1 forward GTCTACACTTAGCCTCTATCCATG, reverse AGGTCAGGATTTTGCAGGTC; SERPING1 forward GTCCTCCTCAATGCTATCTACCTG, reverse GTTTGGTCAATGAAATGGGCCAC; SLC1A2 forward TCTTCCCTGAAAACCTTGCC, reverse AGTCACAGTCTCGTTCAACAG; SLC1A3 forward CCATGTGCTTCGGTTTTGTG, reverse AATCAGGAAGAGAATACCCACG.

### **Immunofluorescence staining**

Astrocytes were grown and treated on glass chamber slides (Nunc Lab-Tek) for immunofluorescence staining and imaging as previously described [34]. After 24 h treatments, medium was removed and cells were washed in DPBS. Cells were then fixed in 4% paraformaldehyde, washed and permeabilized in 0.25% Triton-X, washed again and blocked in 3% fetal bovine serum/3% normal goat serum (Jackson ImmunoResearch). Primary antibody (CD44, Abcam; 1:500 dilution) was diluted in 5% normal goat serum and added to slide wells for overnight incubation at 4°C, after which slides were washed in DPBS with 0.1% tween and incubated with secondary antibody (Alexafluor 555, Invitrogen; 1:1000 dilution in 5% normal goat serum) for 1 h, followed by

DAPI (Sigma-Aldrich; 1 µg/mL in DPBS) for 10 min at room temperature. Cells were washed again before mounting with Prolong mounting medium (Invitrogen) and then imaged on a Zeiss Axioskop fluorescence microscope at 40X magnification. Per cell fluorescence was measured in five images per slide well for each treatment and normalized to the mean of all conditions.

### **Immunoblotting**

Western blotting was performed on whole-cell lysates as previously described [34]. Semi-confluent astrocyte cultures were lysed in ice cold radio-immunoprecipitation assay lysis buffer with protease and phosphatase inhibitors (Roche), and 10 µg protein was separated by electrophoresis on 4-12% polyacrylamide gels followed by transfer to nitrocellulose membranes (all gels/reagents from Bio-Rad). Membranes were then blocked (5% milk in TBS-Tween buffer) and incubated for 18 h with primary antibodies: CD44 (Abcam, 1:1000 dilution); GFAP (ThermoFisher, 1:3000); ICAM-1 (Novus Biologicals, 1:2000); C3 (Novus, 1:2000); IL-1β (Novus, 1:1000). Proteins were then detected with horseradish peroxidase-conjugated secondary antibodies (Jackson ImmunoResearch) and ECL chemiluminescent substrate (Pierce) on a ChemiDoc imager (Bio-Rad), and signal (protein expression) was normalized to glyceraldehyde-3-phosphate dehydrogenase (GAPDH; Cell Signaling, 1:1000).

### **Statistical analyses**

All figures were prepared with GraphPad Prism software, which was also used to perform statistical tests indicated in figure legends. Differentially expressed genes shown in MA plots were detected using Deseq2 software as described above [70], and gene ontology overlap significance (hypergeometric probability) was calculated using the GeneOverlap program [74].

## Supplemental Data

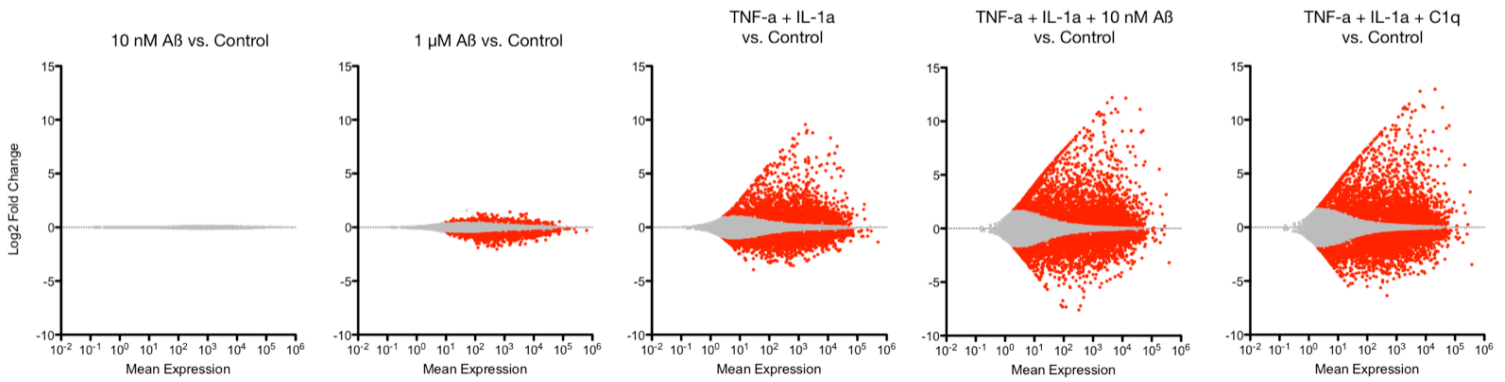

### Supplemental Figure 1. RNA-seq analyses of astrocytes treated with cytokine cocktail or Aβ/cytokines.

MA plots showing Log<sub>2</sub> fold change and mean gene expression in astrocytes treated with low concentration (10 nM) Aβ and/or combinations of TNF-α, IL-1α or C1q. Note no significant transcriptome changes with 10 nM Aβ alone and modest changes with TNF-α+IL-1α, but major and similar gene expression differences with both TNF-α+IL-1α+C1q and TNF-α+IL-1α+Aβ. Significantly increased/decreased genes in red (FDR<0.1). All experiments performed in triplicate with cells from one donor.

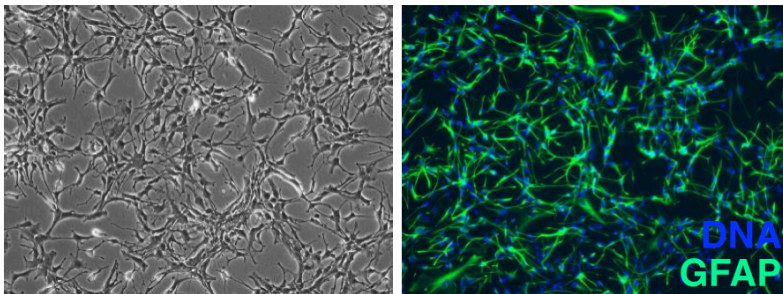

**Supplemental Figure 2. Representative images of primary astrocytes from commercial vendors.** Phase contrast image (left) showing typical astrocyte morphology and immunofluorescence staining (right) showing positive staining for glial fibrillary acidic protein (GFAP) (example provided by ScienCell).

## References

1. Xia X, Jiang Q, McDermott J, Han JJ: **Aging and Alzheimer's disease: Comparison and associations from molecular to system level.** *Aging Cell* 2018, **17**:e12802.
2. van der Kant R, Goldstein LS: **Cellular functions of the amyloid precursor protein from development to dementia.** *Dev Cell* 2015, **32**:502-515.
3. Brothers HM, Gosztyla ML, Robinson SR: **The Physiological Roles of Amyloid-beta Peptide Hint at New Ways to Treat Alzheimer's Disease.** *Front Aging Neurosci* 2018, **10**:118.
4. Reinhard C, Hebert SS, De Strooper B: **The amyloid-beta precursor protein: integrating structure with biological function.** *EMBO J* 2005, **24**:3996-4006.
5. Kinney JW, Bemiller SM, Murtishaw AS, Leisgang AM, Salazar AM, Lamb BT: **Inflammation as a central mechanism in Alzheimer's disease.** *Alzheimers Dement (N Y)* 2018, **4**:575-590.
6. Heneka MT, Carson MJ, El Khoury J, Landreth GE, Brosseron F, Feinstein DL, Jacobs AH, Wyss-Coray T, Vitorica J, Ransohoff RM, et al: **Neuroinflammation in Alzheimer's disease.** *Lancet Neurol* 2015, **14**:388-405.
7. Heneka MT, Kummer MP, Latz E: **Innate immune activation in neurodegenerative disease.** *Nat Rev Immunol* 2014, **14**:463-477.
8. Ransohoff RM: **How neuroinflammation contributes to neurodegeneration.** *Science* 2016, **353**:777-783.
9. Barrientos RM, Kitt MM, Watkins LR, Maier SF: **Neuroinflammation in the normal aging hippocampus.** *Neuroscience* 2015, **309**:84-99.
10. Di Benedetto S, Muller L, Wenger E, Duzel S, Pawelec G: **Contribution of neuroinflammation and immunity to brain aging and the mitigating effects of physical and cognitive interventions.** *Neurosci Biobehav Rev* 2017, **75**:114-128.
11. Calsolaro V, Edison P: **Neuroinflammation in Alzheimer's disease: Current evidence and future directions.** *Alzheimers Dement* 2016, **12**:719-732.
12. Heneka MT: **Inflammasome activation and innate immunity in Alzheimer's disease.** *Brain Pathol* 2017, **27**:220-222.
13. Heneka MT, Golenbock DT, Latz E: **Innate immunity in Alzheimer's disease.** *Nat Immunol* 2015, **16**:229-236.
14. Habib N, McCabe C, Medina S, Varshavsky M, Kitsberg D, Dvir-Szternfeld R, Green G, Dionne D, Nguyen L, Marshall JL, et al: **Disease-associated astrocytes in Alzheimer's disease and aging.** *Nat Neurosci* 2020.
15. Vassar R, Bennett BD, Babu-Khan S, Kahn S, Mendiaz EA, Denis P, Teplow DB, Ross S, Amarante P, Loeloff R, et al: **Beta-secretase cleavage of Alzheimer's amyloid precursor protein by the transmembrane aspartic protease BACE.** *Science* 1999, **286**:735-741.
16. LeBlanc AC, Papadopoulos M, Belair C, Chu W, Crosato M, Powell J, Goodyer CG: **Processing of amyloid precursor protein in human primary neuron and astrocyte cultures.** *J Neurochem* 1997, **68**:1183-1190.
17. Bales KR, Du Y, Holtzman D, Cordell B, Paul SM: **Neuroinflammation and Alzheimer's disease: critical roles for cytokine/Abeta-induced glial activation, NF-kappaB, and apolipoprotein E.** *Neurobiol Aging* 2000, **21**:427-432; discussion 451-423.
18. Speciale L, Ruzzante S, Calabrese E, Saresella M, Taramelli D, Mariani C, Bava L, Longhi R, Ferrante P: **1-40 Beta-amyloid protein fragment modulates the expression of CD44 and CD71 on the astrocytoma cell line in the presence of IL1beta and TNFalpha.** *J Cell Physiol* 2003, **196**:190-195.
19. Gitter BD, Cox LM, Rydel RE, May PC: **Amyloid beta peptide potentiates cytokine secretion by interleukin-1 beta-activated human astrocytoma cells.** *Proc Natl Acad Sci U S A* 1995, **92**:10738-10741.
20. Lotz M, Ebert S, Esselmann H, Iliev AI, Prinz M, Wiazewicz N, Wiltfang J, Gerber J, Nau R: **Amyloid beta peptide 1-40 enhances the action of Toll-like receptor-2 and -4 agonists but antagonizes Toll-like receptor-9-induced inflammation in primary mouse microglial cell cultures.** *J Neurochem* 2005, **94**:289-298.
21. Lee M, Shi X, Barron AE, McGeer E, McGeer PL: **Human antimicrobial peptide LL-37 induces glial-mediated neuroinflammation.** *Biochem Pharmacol* 2015, **94**:130-141.
22. Stewart KL, Radford SE: **Amyloid plaques beyond Abeta: a survey of the diverse modulators of amyloid aggregation.** *Biophys Rev* 2017, **9**:405-419.



23. Zhu B, Wang ZG, Ding J, Liu N, Wang DM, Ding LC, Yang C: **Chronic lipopolysaccharide exposure induces cognitive dysfunction without affecting BDNF expression in the rat hippocampus.** *Exp Ther Med* 2014, **7**:750-754.
24. Denver P, McClean PL: **Distinguishing normal brain aging from the development of Alzheimer's disease: inflammation, insulin signaling and cognition.** *Neural Regen Res* 2018, **13**:1719-1730.
25. Rodrigue KM, Kennedy KM, Park DC: **Beta-amyloid deposition and the aging brain.** *Neuropsychol Rev* 2009, **19**:436-450.
26. Hemonnot AL, Hua J, Ulmann L, Hirbec H: **Microglia in Alzheimer Disease: Well-Known Targets and New Opportunities.** *Front Aging Neurosci* 2019, **11**:233.
27. Liddel SA, Guttenplan KA, Clarke LE, Bennett FC, Bohlen CJ, Schirmer L, Bennett ML, Munch AE, Chung WS, Peterson TC, et al: **Neurotoxic reactive astrocytes are induced by activated microglia.** *Nature* 2017, **541**:481-487.
28. Clarke LE, Liddel SA, Chakraborty C, Munch AE, Heiman M, Barres BA: **Normal aging induces A1-like astrocyte reactivity.** *Proc Natl Acad Sci U S A* 2018, **115**:E1896-E1905.
29. Gouwy M, Struyf S, Proost P, Van Damme J: **Synergy in cytokine and chemokine networks amplifies the inflammatory response.** *Cytokine Growth Factor Rev* 2005, **16**:561-580.
30. White JA, Manelli AM, Holmberg KH, Van Eldik LJ, Ladu MJ: **Differential effects of oligomeric and fibrillar amyloid-beta 1-42 on astrocyte-mediated inflammation.** *Neurobiol Dis* 2005, **18**:459-465.
31. Johnstone M, Gearing AJ, Miller KM: **A central role for astrocytes in the inflammatory response to beta-amyloid; chemokines, cytokines and reactive oxygen species are produced.** *J Neuroimmunol* 1999, **93**:182-193.
32. Smits HA, Rijmsmus A, van Loon JH, Wat JW, Verhoef J, Boven LA, Nottet HS: **Amyloid-beta-induced chemokine production in primary human macrophages and astrocytes.** *J Neuroimmunol* 2002, **127**:160-168.
33. Sekar S, McDonald J, Cuyugan L, Aldrich J, Kurdoglu A, Adkins J, Serrano G, Beach TG, Craig DW, Valla J, et al: **Alzheimer's disease is associated with altered expression of genes involved in immune response and mitochondrial processes in astrocytes.** *Neurobiol Aging* 2015, **36**:583-591.
34. LaRocca TJ, Mariani A, Watkins LR, Link CD: **TDP-43 knockdown causes innate immune activation via protein kinase R in astrocytes.** *Neurobiol Dis* 2019, **132**:104514.
35. Girgrah N, Letarte M, Becker LE, Cruz TF, Theriault E, Moscarello MA: **Localization of the CD44 glycoprotein to fibrous astrocytes in normal white matter and to reactive astrocytes in active lesions in multiple sclerosis.** *J Neuropathol Exp Neurol* 1991, **50**:779-792.
36. Cline EN, Bicca MA, Viola KL, Klein WL: **The Amyloid-beta Oligomer Hypothesis: Beginning of the Third Decade.** *J Alzheimers Dis* 2018, **64**:S567-S610.
37. Akiyama H, Kawamata T, Yamada T, Tooyama I, Ishii T, McGeer PL: **Expression of intercellular adhesion molecule (ICAM)-1 by a subset of astrocytes in Alzheimer disease and some other degenerative neurological disorders.** *Acta Neuropathol* 1993, **85**:628-634.
38. Lee SJ, Benveniste EN: **Adhesion molecule expression and regulation on cells of the central nervous system.** *J Neuroimmunol* 1999, **98**:77-88.
39. Frohman EM, Frohman TC, Gupta S, de Fougères A, van den Noort S: **Expression of intercellular adhesion molecule 1 (ICAM-1) in Alzheimer's disease.** *J Neurol Sci* 1991, **106**:105-111.
40. Bi F, Huang C, Tong J, Qiu G, Huang B, Wu Q, Li F, Xu Z, Bowser R, Xia XG, Zhou H: **Reactive astrocytes secrete Icn2 to promote neuron death.** *Proc Natl Acad Sci U S A* 2013, **110**:4069-4074.
41. Lazarevic V, Fienko S, Andres-Alonso M, Anni D, Ivanova D, Montenegro-Venegas C, Gundelfinger ED, Cousin MA, Fejtova A: **Physiological Concentrations of Amyloid Beta Regulate Recycling of Synaptic Vesicles via Alpha7 Acetylcholine Receptor and CDK5/Calcineurin Signaling.** *Front Mol Neurosci* 2017, **10**:221.
42. Maezawa I, Zimin PI, Wulff H, Jin LW: **Amyloid-beta protein oligomer at low nanomolar concentrations activates microglia and induces microglial neurotoxicity.** *J Biol Chem* 2011, **286**:3693-3706.
43. Garwood CJ, Ratcliffe LE, Simpson JE, Heath PR, Ince PG, Wharton SB: **Review: Astrocytes in Alzheimer's disease and other age-associated dementias: a supporting player with a central role.** *Neuropathol Appl Neurobiol* 2017, **43**:281-298.
44. Hur JY, Frost GR, Wu X, Crump C, Pan SJ, Wong E, Barros M, Li T, Nie P, Zhai Y, et al: **The innate immunity protein IFITM3 modulates gamma-secretase in Alzheimer's disease.** *Nature* 2020.

45. Seubert P, Vigo-Pelfrey C, Esch F, Lee M, Dovey H, Davis D, Sinha S, Schlossmacher M, Whaley J, Swindlehurst C, et al.: **Isolation and quantification of soluble Alzheimer's beta-peptide from biological fluids.** *Nature* 1992, **359**:325-327.
46. Roher AE, Esh CL, Kokjohn TA, Castano EM, Van Vickle GD, Kalback WM, Patton RL, Luehrs DC, Dausgs ID, Kuo YM, et al: **Amyloid beta peptides in human plasma and tissues and their significance for Alzheimer's disease.** *Alzheimers Dement* 2009, **5**:18-29.
47. Novo M, Freire S, Al-Soufi W: **Critical aggregation concentration for the formation of early Amyloid-beta (1-42) oligomers.** *Sci Rep* 2018, **8**:1783.
48. Raskatov JA: **What Is the "Relevant" Amyloid beta42 Concentration?** *Chembiochem* 2019, **20**:1725-1726.
49. Barbar L, Jain T, Zimmer M, Kruglikov I, Sadick JS, Wang M, Kalpana K, Rose IVL, Burstein SR, Rusielewicz T, et al: **CD49f Is a Novel Marker of Functional and Reactive Human iPSC-Derived Astrocytes.** *Neuron* 2020.
50. Zhou Y, Song WM, Andhey PS, Swain A, Levy T, Miller KR, Poliani PL, Cominelli M, Grover S, Gilfillan S, et al: **Human and mouse single-nucleus transcriptomics reveal TREM2-dependent and TREM2-independent cellular responses in Alzheimer's disease.** *Nat Med* 2020, **26**:131-142.
51. Lambert MP, Viola KL, Chromy BA, Chang L, Morgan TE, Yu J, Venton DL, Krafft GA, Finch CE, Klein WL: **Vaccination with soluble Abeta oligomers generates toxicity-neutralizing antibodies.** *J Neurochem* 2001, **79**:595-605.
52. Hung LW, Ciccotosto GD, Giannakis E, Tew DJ, Perez K, Masters CL, Cappai R, Wade JD, Barnham KJ: **Amyloid-beta peptide (Abeta) neurotoxicity is modulated by the rate of peptide aggregation: Abeta dimers and trimers correlate with neurotoxicity.** *J Neurosci* 2008, **28**:11950-11958.
53. Chen GF, Xu TH, Yan Y, Zhou YR, Jiang Y, Melcher K, Xu HE: **Amyloid beta: structure, biology and structure-based therapeutic development.** *Acta Pharmacol Sin* 2017, **38**:1205-1235.
54. Melchor JP, McVoy L, Van Nostrand WE: **Charge alterations of E22 enhance the pathogenic properties of the amyloid beta-protein.** *J Neurochem* 2000, **74**:2209-2212.
55. Jarosz-Griffiths HH, Noble E, Rushworth JV, Hooper NM: **Amyloid-beta Receptors: The Good, the Bad, and the Prion Protein.** *J Biol Chem* 2016, **291**:3174-3183.
56. Mroczo B, Groblewska M, Litman-Zawadzka A, Kornhuber J, Lewczuk P: **Cellular Receptors of Amyloid beta Oligomers (AbetaOs) in Alzheimer's Disease.** *Int J Mol Sci* 2018, **19**.
57. Gratuze M, Leyns CEG, Holtzman DM: **New insights into the role of TREM2 in Alzheimer's disease.** *Mol Neurodegener* 2018, **13**:66.
58. Karch CM, Goate AM: **Alzheimer's disease risk genes and mechanisms of disease pathogenesis.** *Biol Psychiatry* 2015, **77**:43-51.
59. Lourenco MV, Clarke JR, Frozza RL, Bomfim TR, Forny-Germano L, Batista AF, Sathler LB, Brito-Moreira J, Amaral OB, Silva CA, et al: **TNF-alpha mediates PKR-dependent memory impairment and brain IRS-1 inhibition induced by Alzheimer's beta-amyloid oligomers in mice and monkeys.** *Cell Metab* 2013, **18**:831-843.
60. Allnutt MA, Johnson K, Bennett DA, Connor SM, Troncoso JC, Pletnikova O, Albert MS, Resnick SM, Scholz SW, De Jager PL, Jacobson S: **Human Herpesvirus 6 Detection in Alzheimer's Disease Cases and Controls across Multiple Cohorts.** *Neuron* 2020, **105**:1027-1035 e1022.
61. Itzhaki RF: **A Turning Point in Alzheimer's Disease: Microbes Matter.** *J Alzheimers Dis* 2019, **72**:977-980.
62. Sochocka M, Zwolinska K, Leszek J: **The Infectious Etiology of Alzheimer's Disease.** *Curr Neuropharmacol* 2017, **15**:996-1009.
63. Cairns DM, Rouleau N, Parker RN, Walsh KG, Gehrke L, Kaplan DL: **A 3D human brain-like tissue model of herpes-induced Alzheimer's disease.** *Science Advances* 2020, **6**:eaay8828.
64. Sharif A, Prevot V: **Isolation and culture of human astrocytes.** *Methods Mol Biol* 2012, **814**:137-151.
65. Stine WB, Jungbauer L, Yu C, LaDu MJ: **Preparing synthetic Abeta in different aggregation states.** *Methods Mol Biol* 2011, **670**:13-32.
66. Fonte V, Dostal V, Roberts CM, Gonzales P, Lacor PN, Velasco PT, Magrane J, Dingwell N, Fan EY, Silverman MA, et al: **A glycine zipper motif mediates the formation of toxic beta-amyloid oligomers in vitro and in vivo.** *Mol Neurodegener* 2011, **6**:61.
67. Chen S, Zhou Y, Chen Y, Gu J: **fastp: an ultra-fast all-in-one FASTQ preprocessor.** *Bioinformatics* 2018, **34**:i884-i890.

68. Dobin A, Davis CA, Schlesinger F, Drenkow J, Zaleski C, Jha S, Batut P, Chaisson M, Gingeras TR: **STAR: ultrafast universal RNA-seq aligner.** *Bioinformatics* 2013, **29**:15-21.
69. Anders S, Pyl PT, Huber W: **HTSeq--a Python framework to work with high-throughput sequencing data.** *Bioinformatics* 2015, **31**:166-169.
70. Love MI, Huber W, Anders S: **Moderated estimation of fold change and dispersion for RNA-seq data with DESeq2.** *Genome Biol* 2014, **15**:550.
71. Eden E, Navon R, Steinfeld I, Lipson D, Yakhini Z: **GOrilla: a tool for discovery and visualization of enriched GO terms in ranked gene lists.** *BMC Bioinformatics* 2009, **10**:48.
72. Dennis G, Jr., Sherman BT, Hosack DA, Yang J, Gao W, Lane HC, Lempicki RA: **DAVID: Database for Annotation, Visualization, and Integrated Discovery.** *Genome Biol* 2003, **4**:P3.
73. Supek F, Bosnjak M, Skunca N, Smuc T: **REVIGO summarizes and visualizes long lists of gene ontology terms.** *PLoS One* 2011, **6**:e21800.
74. Shen L: **GeneOverlap: An R package to test and visualize gene overlaps.** *R Package* 2014.
